# Supplementary material for: Cross-species cell-type assignment from single-cell RNA-seq data by a heterogeneous graph neural network
Source: HighWire-hosted journal article supplement (doi:10.1101/gr.276868.122), 2022-12-16
Supplement: Supplemental_Table_2_JDedit.xlsx [file Supplemental_Table_2_JDedit.xlsx]

## Sheet: Table S2
Module	ID	Description	p.adjust	Module	ID	Description	p.adjust
human_0 (607)	GO:0042391	regulation of membrane potential	5.43097e-06	mouse_0 (467)	GO:0034765	regulation of ion transmembrane transport	1.42655e-09
	GO:0034765	regulation of ion transmembrane transport	5.43097e-06		GO:0042391	regulation of membrane potential	1.42655e-09
	GO:0099177	regulation of trans-synaptic signaling	5.43097e-06		GO:0007409	axonogenesis	1.42655e-09
	GO:0050804	modulation of chemical synaptic transmission	1.15382e-05		GO:1904062	regulation of cation transmembrane transport	1.42655e-09
	GO:0010975	regulation of neuron projection development	0.000198702		GO:0015672	monovalent inorganic cation transport	4.11746e-08
	GO:0043266	regulation of potassium ion transport	0.000341258		GO:0032409	regulation of transporter activity	8.66296e-08
	GO:0035637	multicellular organismal signaling	0.000341258		GO:0051961	negative regulation of nervous system development	1.992e-07
	GO:1903522	regulation of blood circulation	0.000346861		GO:0010959	regulation of metal ion transport	2.74983e-07
	GO:0008016	regulation of heart contraction	0.000346861		GO:0050808	synapse organization	1.01955e-06
	GO:0007611	learning or memory	0.000432703		GO:0099504	synaptic vesicle cycle	1.12807e-06
human_1 (265)	GO:0003158	endothelium development	2.33943e-12	mouse_1 (515)	GO:0035456	response to interferon-beta	1.03182e-14
	GO:0030198	extracellular matrix organization	3.05395e-12		GO:1901342	regulation of vasculature development	1.72214e-13
	GO:0034340	response to type I interferon	3.29578e-10		GO:0003158	endothelium development	1.12656e-11
	GO:0045765	regulation of angiogenesis	5.81785e-09		GO:0035458	cellular response to interferon-beta	1.53214e-09
	GO:0072132	mesenchyme morphogenesis	1.01932e-07		GO:0001570	vasculogenesis	4.80332e-09
	GO:0048844	artery morphogenesis	2.89776e-07		GO:0034341	response to interferon-gamma	1.07382e-08
	GO:0090130	tissue migration	1.32048e-06		GO:0045446	endothelial cell differentiation	2.14151e-08
	GO:0045446	endothelial cell differentiation	1.35089e-06		GO:0031348	negative regulation of defense response	3.13006e-07
	GO:0035296	regulation of tube diameter	1.6179e-06		GO:0002697	regulation of immune effector process	3.23862e-07
	GO:0050880	regulation of blood vessel size	1.6179e-06		GO:0031341	regulation of cell killing	3.28715e-07
human_2 (337)	GO:0021879	forebrain neuron differentiation	1.20469e-05	mouse_2 (357)	GO:0015837	amine transport	3.54433e-07
	GO:0043279	response to alkaloid	0.000227694		GO:0032228	regulation of synaptic transmission, GABAergic	3.54433e-07
	GO:0008217	regulation of blood pressure	0.000326069		GO:0007611	learning or memory	2.48334e-06
	GO:0050804	modulation of chemical synaptic transmission	0.000374422		GO:0008015	blood circulation	3.24658e-06
	GO:0099177	regulation of trans-synaptic signaling	0.000374422		GO:0006936	muscle contraction	4.92425e-06
	GO:0033555	multicellular organismal response to stress	0.000374422		GO:0050890	cognition	4.99925e-06
	GO:0072347	response to anesthetic	0.000554989		GO:0021879	forebrain neuron differentiation	6.01268e-06
	GO:0023061	signal release	0.000624644		GO:0045471	response to ethanol	7.1665e-06
	GO:0007611	learning or memory	0.000841985		GO:0008217	regulation of blood pressure	2.56871e-05
	GO:0007618	mating	0.000841985		GO:0033555	multicellular organismal response to stress	5.15578e-05
human_3 (509)	GO:0021533	cell differentiation in hindbrain	0.0806086	mouse_3 (184)	GO:0021537	telencephalon development	0.0148828
	GO:0071542	dopaminergic neuron differentiation	0.0806086		GO:0030900	forebrain development	0.0148828
	GO:0021697	cerebellar cortex formation	0.0806086		GO:0090276	regulation of peptide hormone secretion	0.0148828
	GO:0090009	primitive streak formation	0.0840108		GO:0021533	cell differentiation in hindbrain	0.0148828
	GO:1904338	regulation of dopaminergic neuron differentiation	0.0840108		GO:0015696	ammonium transport	0.0148828
	GO:0021517	ventral spinal cord development	0.0840108		GO:0021697	cerebellar cortex formation	0.0148828
	GO:0001964	startle response	0.0840108		GO:0060134	prepulse inhibition	0.0364635
	GO:2000543	positive regulation of gastrulation	0.0947713		GO:0071542	dopaminergic neuron differentiation	0.0368009
	GO:0060134	prepulse inhibition	0.132307		GO:0007157	heterophilic cell-cell adhesion via plasma membrane cell adhesion molecules	0.0511204
	GO:0014808	release of sequestered calcium ion into cytosol by sarcoplasmic reticulum	0.140424		GO:0097107	postsynaptic density assembly	0.0515289
human_4 (311)	GO:0015807	L-amino acid transport	6.72626e-06	mouse_4 (348)	GO:0048708	astrocyte differentiation	2.10989e-06
	GO:1902475	L-alpha-amino acid transmembrane transport	6.72626e-06		GO:0070371	ERK1 and ERK2 cascade	1.6598e-05
	GO:0006855	drug transmembrane transport	8.17036e-05		GO:0009611	response to wounding	5.97478e-05
	GO:0010001	glial cell differentiation	0.00014973		GO:0015711	organic anion transport	6.77905e-05
	GO:0071496	cellular response to external stimulus	0.000162425		GO:0050678	regulation of epithelial cell proliferation	0.000179064
	GO:1905039	carboxylic acid transmembrane transport	0.000359136		GO:0051145	smooth muscle cell differentiation	0.000179064
	GO:0050678	regulation of epithelial cell proliferation	0.000469779		GO:0051961	negative regulation of nervous system development	0.000179064
	GO:0001656	metanephros development	0.00071466		GO:0060441	epithelial tube branching involved in lung morphogenesis	0.000216878
	GO:0070371	ERK1 and ERK2 cascade	0.000986795		GO:0060541	respiratory system development	0.000227452
	GO:1900272	negative regulation of long-term synaptic potentiation	0.00100546		GO:0046688	response to copper ion	0.000402573
human_5 (309)	GO:0050804	modulation of chemical synaptic transmission	0.023838	mouse_5 (296)	GO:0033141	positive regulation of peptidyl-serine phosphorylation of STAT protein	2.64521e-08
	GO:0099177	regulation of trans-synaptic signaling	0.023838		GO:0033139	regulation of peptidyl-serine phosphorylation of STAT protein	2.64521e-08
	GO:0010975	regulation of neuron projection development	0.023838		GO:0002323	natural killer cell activation involved in immune response	3.09671e-06
	GO:0050808	synapse organization	0.0249346		GO:0043330	response to exogenous dsRNA	3.13556e-06
	GO:0007416	synapse assembly	0.0249346		GO:0046425	regulation of JAK-STAT cascade	3.94185e-05
	GO:0051961	negative regulation of nervous system development	0.0249346		GO:0030183	B cell differentiation	8.95831e-05
	GO:0051963	regulation of synapse assembly	0.028575		GO:0030101	natural killer cell activation	0.0020784
	GO:1904668	positive regulation of ubiquitin protein ligase activity	0.0547442		GO:0010721	negative regulation of cell development	0.0075643
	GO:0032102	negative regulation of response to external stimulus	0.0597066		GO:0046879	hormone secretion	0.0148461
	GO:0050807	regulation of synapse organization	0.0654429		GO:0009914	hormone transport	0.0175949
human_6 (249)	GO:0001819	positive regulation of cytokine production	2.68684e-19	mouse_6 (311)	GO:0001819	positive regulation of cytokine production	1.66893e-30
	GO:0070661	leukocyte proliferation	7.60607e-18		GO:0002274	myeloid leukocyte activation	1.96465e-28
	GO:0042116	macrophage activation	7.60607e-18		GO:0031349	positive regulation of defense response	4.10569e-25
	GO:0050900	leukocyte migration	7.60607e-18		GO:0050900	leukocyte migration	3.032e-24
	GO:0061900	glial cell activation	2.26086e-17		GO:0032103	positive regulation of response to external stimulus	4.12384e-22
	GO:0042089	cytokine biosynthetic process	2.39345e-17		GO:0032635	interleukin-6 production	2.49988e-19
	GO:0002269	leukocyte activation involved in inflammatory response	2.39345e-17		GO:0019221	cytokine-mediated signaling pathway	3.98173e-18
	GO:0042107	cytokine metabolic process	2.39345e-17		GO:0050715	positive regulation of cytokine secretion	1.48938e-16
	GO:0150076	neuroinflammatory response	2.719e-17		GO:0002275	myeloid cell activation involved in immune response	1.28784e-14
	GO:0006909	phagocytosis	4.94723e-17		GO:0050729	positive regulation of inflammatory response	1.28784e-14
human_7 (291)	GO:0007626	locomotory behavior	0.00517235	mouse_7 (242)	GO:0086003	cardiac muscle cell contraction	0.00292928
	GO:0050804	modulation of chemical synaptic transmission	0.00517235		GO:0006941	striated muscle contraction	0.00623787
	GO:0099177	regulation of trans-synaptic signaling	0.00517235		GO:0070252	actin-mediated cell contraction	0.00623787
	GO:0008344	adult locomotory behavior	0.006667		GO:0071621	granulocyte chemotaxis	0.00623787
	GO:0050770	regulation of axonogenesis	0.006667		GO:0060048	cardiac muscle contraction	0.00623787
	GO:0022604	regulation of cell morphogenesis	0.00890797		GO:0097529	myeloid leukocyte migration	0.00623787
	GO:0031346	positive regulation of cell projection organization	0.00890797		GO:0086004	regulation of cardiac muscle cell contraction	0.00663808
	GO:0007612	learning	0.0217236		GO:0048168	regulation of neuronal synaptic plasticity	0.00663808
	GO:0021761	limbic system development	0.0217236		GO:0034341	response to interferon-gamma	0.00663808
	GO:0016358	dendrite development	0.0217236		GO:0086009	membrane repolarization	0.00663808
human_8 (283)	GO:0042552	myelination	1.58305e-11	mouse_8 (156)	GO:0007272	ensheathment of neurons	7.56598e-12
	GO:0007272	ensheathment of neurons	1.58305e-11		GO:0008366	axon ensheathment	7.56598e-12
	GO:0008366	axon ensheathment	1.58305e-11		GO:0048709	oligodendrocyte differentiation	8.24069e-08
	GO:0048709	oligodendrocyte differentiation	1.53913e-08		GO:0014013	regulation of gliogenesis	0.000348072
	GO:0046394	carboxylic acid biosynthetic process	0.00617042		GO:0046394	carboxylic acid biosynthetic process	0.000669148
	GO:0016053	organic acid biosynthetic process	0.00617042		GO:0016053	organic acid biosynthetic process	0.000669148
	GO:0006681	galactosylceramide metabolic process	0.0145619		GO:0031643	positive regulation of myelination	0.0182431
	GO:0048713	regulation of oligodendrocyte differentiation	0.0404352		GO:0048008	platelet-derived growth factor receptor signaling pathway	0.0252242
	GO:0007096	regulation of exit from mitosis	0.0529223		GO:0010927	cellular component assembly involved in morphogenesis	0.028273
	GO:0014911	positive regulation of smooth muscle cell migration	0.0579189		GO:0031032	actomyosin structure organization	0.0504647
human_9 (154)	GO:0051966	regulation of synaptic transmission, glutamatergic	0.000267361	mouse_9 (113)	GO:0015711	organic anion transport	0.001727
	GO:0099177	regulation of trans-synaptic signaling	0.00315017		GO:0050807	regulation of synapse organization	0.001727
	GO:0031223	auditory behavior	0.0138797		GO:0098742	cell-cell adhesion via plasma-membrane adhesion molecules	0.001727
	GO:0021536	diencephalon development	0.0150193		GO:0050803	regulation of synapse structure or activity	0.001727
	GO:0007158	neuron cell-cell adhesion	0.0177753		GO:0050808	synapse organization	0.00176979
	GO:0071625	vocalization behavior	0.0223609		GO:0043266	regulation of potassium ion transport	0.00233743
	GO:0060078	regulation of postsynaptic membrane potential	0.0223609		GO:0019934	cGMP-mediated signaling	0.00531799
	GO:0030534	adult behavior	0.0234804		GO:0048265	response to pain	0.00531799
	GO:0007612	learning	0.0234804		GO:1901214	regulation of neuron death	0.00643565
	GO:0071695	anatomical structure maturation	0.044268		GO:1901379	regulation of potassium ion transmembrane transport	0.00643565
human_10 (143)	GO:0030206	chondroitin sulfate biosynthetic process	0.000108323	mouse_10 (108)	GO:0043062	extracellular structure organization	0.00118006
	GO:0048709	oligodendrocyte differentiation	0.000108323		GO:0048709	oligodendrocyte differentiation	0.00118006
	GO:0050650	chondroitin sulfate proteoglycan biosynthetic process	0.000108323		GO:0002052	positive regulation of neuroblast proliferation	0.00118006
	GO:0043062	extracellular structure organization	0.000487478		GO:2000648	positive regulation of stem cell proliferation	0.00743929
	GO:0006029	proteoglycan metabolic process	0.000723086		GO:0045773	positive regulation of axon extension	0.00743929
	GO:0032102	negative regulation of response to external stimulus	0.00282172		GO:2000177	regulation of neural precursor cell proliferation	0.00743929
	GO:0045773	positive regulation of axon extension	0.00309474		GO:0002040	sprouting angiogenesis	0.00766503
	GO:0006024	glycosaminoglycan biosynthetic process	0.00859141		GO:0010811	positive regulation of cell-substrate adhesion	0.0104016
	GO:0002052	positive regulation of neuroblast proliferation	0.00859141		GO:0010810	regulation of cell-substrate adhesion	0.0104016
	GO:1903510	mucopolysaccharide metabolic process	0.00889662		GO:0072089	stem cell proliferation	0.0128345

## Sheet: README
Supplemental Table S2. Top 10 enriched GO terms for each of the gene modules extracted from scRNA-seq data of human and mouse brains. All the GO terms are filtered by the Benjamini-Hochberg adjusted p-value < 0.1
