# Supplementary material for: Cross-species cell-type assignment from single-cell RNA-seq data by a heterogeneous graph neural network
Source: HighWire-hosted journal article supplement (doi:10.1101/gr.276868.122), 2022-12-16
Supplement: Supplemental_Table_3_JDedit.xlsx [file Supplemental_Table_3_JDedit.xlsx]

## Sheet: Table S3
Module	ID	Description	Adjust p value	Module	ID	Description	Adjust p value
human_0 (100)	GO:0022412	cellular process involved in reproduction in multicellular organism	3.93145e-06	macaque_0 (153)	GO:0006413	translational initiation	1.07521e-08
	GO:0007140	male meiotic nuclear division	0.00111985		GO:0000184	nuclear-transcribed mRNA catabolic process, nonsense-mediated decay	8.75928e-08
	GO:0007286	spermatid development	0.0012419		GO:0045047	protein targeting to ER	5.56767e-07
	GO:0048515	spermatid differentiation	0.0012419		GO:0072599	establishment of protein localization to endoplasmic reticulum	6.43576e-07
	GO:0044782	cilium organization	0.0012419		GO:0022412	cellular process involved in reproduction in multicellular organism	3.05865e-06
	GO:0009566	fertilization	0.00251924		GO:0140013	meiotic nuclear division	8.76842e-06
	GO:0048285	organelle fission	0.00302606		GO:0019083	viral transcription	1.0603e-05
	GO:0051321	meiotic cell cycle	0.00940484		GO:1903046	meiotic cell cycle process	1.73247e-05
	GO:0140013	meiotic nuclear division	0.00940484		GO:0019080	viral gene expression	1.87431e-05
	GO:0006402	mRNA catabolic process	0.0136399		GO:0048285	organelle fission	3.1381e-05
human_1 (123)	GO:0007286	spermatid development	1.55881e-05	macaque_1 (129)	GO:0030317	flagellated sperm motility	0.0151889
	GO:0048515	spermatid differentiation	1.55881e-05		GO:0097722	sperm motility	0.0151889
	GO:0030317	flagellated sperm motility	2.78632e-05		GO:0007338	single fertilization	0.0151889
	GO:0097722	sperm motility	2.78632e-05		GO:0007286	spermatid development	0.0865102
	GO:0007338	single fertilization	5.33508e-05		GO:0048515	spermatid differentiation	0.0865102
	GO:0022412	cellular process involved in reproduction in multicellular organism	0.000460181
	GO:0035092	sperm chromatin condensation	0.00212205
	GO:0046365	monosaccharide catabolic process	0.0159118
	GO:0006735	NADH regeneration	0.0159118
	GO:0061621	canonical glycolysis	0.0159118
human_2 (62)	GO:0007342	fusion of sperm to egg plasma membrane involved in single fertilization	9.89846e-06	macaque_2 (59)	GO:0007342	fusion of sperm to egg plasma membrane involved in single fertilization	6.38433e-06
	GO:0045026	plasma membrane fusion	1.23799e-05		GO:0045026	plasma membrane fusion	7.99027e-06
	GO:0022412	cellular process involved in reproduction in multicellular organism	0.000509486		GO:0022412	cellular process involved in reproduction in multicellular organism	0.000227867
	GO:0050829	defense response to Gram-negative bacterium	0.00220631		GO:0007099	centriole replication	0.00339423
	GO:0007030	Golgi organization	0.00953167		GO:0007338	single fertilization	0.00573129
	GO:0007338	single fertilization	0.00976554		GO:0061025	membrane fusion	0.00573129
	GO:0061025	membrane fusion	0.00976554		GO:0051495	positive regulation of cytoskeleton organization	0.0171473
	GO:0007098	centrosome cycle	0.0595852		GO:0006338	chromatin remodeling	0.0917287
	GO:0051495	positive regulation of cytoskeleton organization	0.182421
human_3 (51)	GO:0006402	mRNA catabolic process	9.46635e-06	macaque_3 (43)	GO:0006402	mRNA catabolic process	0.000255421
	GO:0071824	protein-DNA complex subunit organization	9.46635e-06		GO:0006401	RNA catabolic process	0.000255421
	GO:0006401	RNA catabolic process	9.46635e-06		GO:0006413	translational initiation	0.00955011
	GO:0006338	chromatin remodeling	6.80324e-05		GO:0006614	SRP-dependent cotranslational protein targeting to membrane	0.0101314
	GO:0071103	DNA conformation change	0.000215029		GO:0006613	cotranslational protein targeting to membrane	0.0101314
	GO:0006614	SRP-dependent cotranslational protein targeting to membrane	0.000742643		GO:0045047	protein targeting to ER	0.0101314
	GO:0006613	cotranslational protein targeting to membrane	0.000742643		GO:0072599	establishment of protein localization to endoplasmic reticulum	0.0101314
	GO:0006413	translational initiation	0.000742643		GO:0008380	RNA splicing	0.0191847
	GO:0072599	establishment of protein localization to endoplasmic reticulum	0.000896822		GO:0008088	axo-dendritic transport	0.0241108
	GO:0042274	ribosomal small subunit biogenesis	0.00158958		GO:0019083	viral transcription	0.0241108
human_4 (42)	GO:0051321	meiotic cell cycle	0.000568577	macaque_4 (32)	GO:0008380	RNA splicing	0.00292971
	GO:0140013	meiotic nuclear division	0.000568577		GO:0000819	sister chromatid segregation	0.00292971
	GO:0000280	nuclear division	0.000568577		GO:0000377	RNA splicing, via transesterification reactions with bulged adenosine as nucleophile	0.00292971
	GO:1903046	meiotic cell cycle process	0.000568577		GO:0000398	mRNA splicing, via spliceosome	0.00292971
	GO:0000819	sister chromatid segregation	0.000568577		GO:0000375	RNA splicing, via transesterification reactions	0.00292971
	GO:0034975	protein folding in endoplasmic reticulum	0.00070917		GO:0098813	nuclear chromosome segregation	0.00531654
	GO:0000377	RNA splicing, via transesterification reactions with bulged adenosine as nucleophile	0.00146807		GO:0034975	protein folding in endoplasmic reticulum	0.0230369
	GO:0000398	mRNA splicing, via spliceosome	0.00146807		GO:0000280	nuclear division	0.0251878
	GO:0000375	RNA splicing, via transesterification reactions	0.00146807		GO:0051321	meiotic cell cycle	0.0283339
	GO:0098813	nuclear chromosome segregation	0.00167298		GO:0071157	negative regulation of cell cycle arrest	0.028953
human_5 (27)	GO:0030575	nuclear body organization	0.0429695	macaque_5 (31)	GO:0007286	spermatid development	0.00717381
	GO:0006656	phosphatidylcholine biosynthetic process	0.0826676		GO:0048515	spermatid differentiation	0.00717381
					GO:0022412	cellular process involved in reproduction in multicellular organism	0.0811866

## Sheet: README
Supplemental Table S3. Top 10 enriched GO terms for each of the gene modules extracted from scRNA-seq data of human and macaque testis. All the GO terms are filtered by the Benjamini-Hochberg adjusted p-value < 0.1
